# Supplementary material for: Organic dyes containing dithieno[2,3-d:2′,3′-d′]thieno[3,2-b:3′,2′-b′]dipyrrole core for efficient dye-sensitized solar cells
Source: Royal Society of Chemistry journal article supplement (doi:10.1039/c4ta06705c), 2015-01-01
Supplement: c4ta06705c1.pdf [file c4ta06705c1.pdf]

## Supplementary information

### **Organic dyes containing dithieno[2,3-d:2',3'-d']thieno[3,2-b:3',2'-b']dipyrrole core for efficient dye-sensitized solar cells**

Zhihui Wang,<sup>b</sup> Mao Liang,<sup>\*ac</sup> Yulin Tan,<sup>a</sup> Liyan Ouyang,<sup>a</sup> Zhe Sun<sup>a</sup> and Song Xue<sup>\*a</sup>

<sup>a</sup> Tianjin Key Laboratory of Organic Solar Cells and Photochemical Conversion, Department of Applied Chemistry, Tianjin University of Technology, Tianjin 300384, P.R.China.

<sup>b</sup> Faculty of Life Science and Chemical Engineering, Key Laboratory for Palygorskite Science and Applied Technology of Jiangsu, Huaiyin Institute of Technology, Jiangsu Province, Huaian 223003, P.R. China.

<sup>c</sup> Key Laboratory of Advanced Energy Materials Chemistry (Ministry of Education), Collaborative Innovation Center of Chemical Science and Engineering, Nankai University, Tianjin 300071, P.R. China.

*E-mail: liangmao717@126.com; xuesong@ustc.edu.cn*

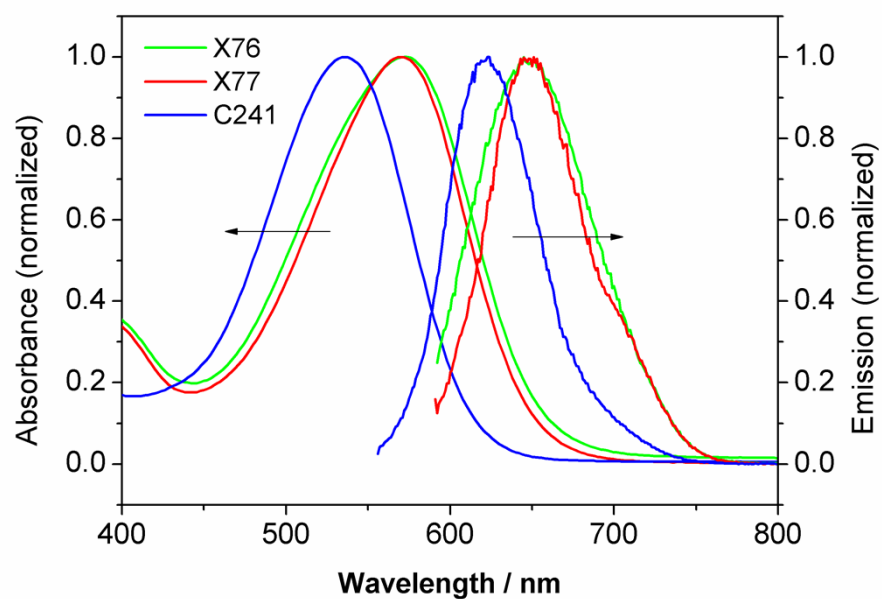

**Fig. S1** Absorption and emission spectra of the dyes in dichloromethane.

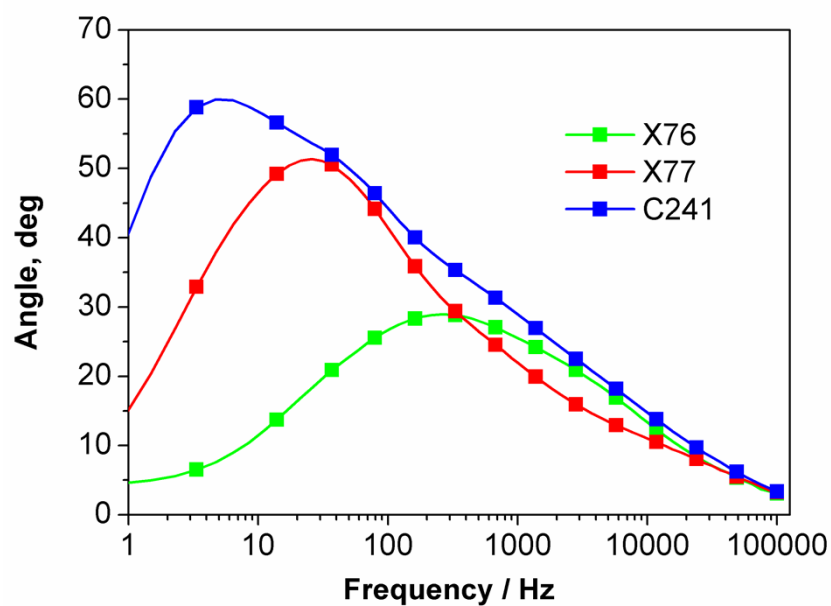

**Fig. S2** Bode phase plots for the cobalt cells.

**Table S1.** Photovoltaic performance of the iodine cells using a 9  $\mu\text{m}$  film.

| dye  | $J_{SC}$ ( $\text{mA cm}^{-2}$ ) | $V_{OC}$ (mV) | $FF$ | PCE (%) |
|------|----------------------------------|---------------|------|---------|
| X76  | 5.3                              | 505           | 0.65 | 1.7     |
| X77  | 8.5                              | 613           | 0.67 | 3.5     |
| C241 | 11.6                             | 655           | 0.68 | 5.2     |

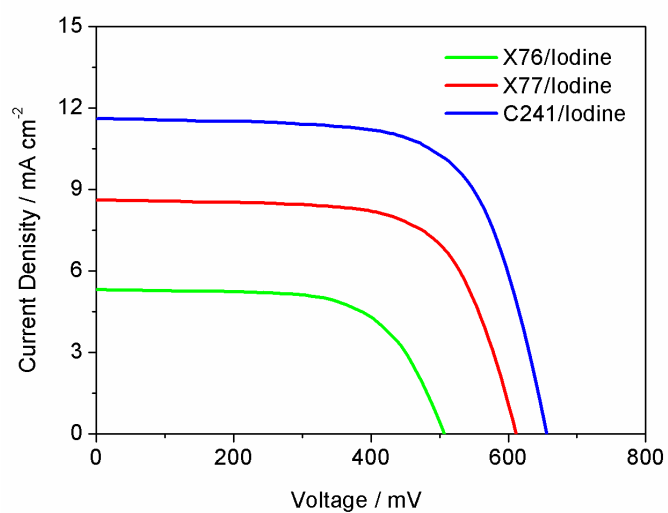

**Fig. S3**  $J$ – $V$  curves of studied DSC devices employing the iodine electrolyte under AM1.5G simulated solar light ( $100 \text{ mW cm}^{-2}$ ).
